# Supplementary material
Source: publisher figshare collection journal article supplement (https://gsapubs.figshare.com/ndownloader/files/23298854)
Supplement: Supplementary file 1 [file 23298854]

## Sheet: Isotope data
Sample Number	d13Ccarb (V-PDB)	d18Ocarb (V-PDB)	Stratigraphic Height (m)
500	0.0611217	-8.59175	0.07																						Negative anomalies	Sample #s		26	27	28	29
501	-0.348543	-8.41675	0.28																						10.51	542		111	104	501	100
502	-0.461483	-8.38173	0.55																						21.68	575		116	109	502	101
503	-0.498654	-8.34529	0.76																						25.92	588		118	124	503	102
504	-0.536619	-8.40383	0.97																						56.1	639		128	127	504	103
505	-0.0817204	-8.77111	1.17																						88.12	696		133	147	513	105
506	-0.563545	-8.57963	1.38																						Separate			134	500	515	107
507	-0.104857	-8.22511	1.75																									142	502	516	108
509	-0.295984	-8.46988	2.17																						Positive Anomalies			506	505	517	110
510	-0.0414832	-8.52021	2.38																						0.07	500		539	507	519	112
511	-0.348292	-8.66917	2.59																						3.28	514		542	509	521	113
512	-0.35131	-8.31352	2.86																						13.75	554		549	510	522	114
513	-0.371772	-8.2799	3.11																						17.71	568		553	511	524	115
514	0.17278	-8.53452	3.28																						24.53	585		560	512	525	117
515	-0.229903	-8.23809	3.45																						66.99	659		573	514	530	119
516	-0.510893	-8.59086	3.75																						Mostly in 11/27			575	518	533	120
517	-0.559348	-8.30626	3.98																									579	520	534	121
518	-0.0588355	-8.69855	4.21																									581	523	536	122
519	-0.669496	-7.99252	4.46																									584	526	537	123
520	-0.416947	-8.56748	4.67																									587	527	541	125
521	-0.616545	-8.47606	4.92																									592	528	544	126
522	-0.669496	-8.68463	5.18																									596	529	545	129
523	-0.256752	-8.5731	5.45																									597	531	546	130
524	-0.803871	-8.27509	5.75																									601	532	547	131
525	-0.558848	-8.69578	6.03																									603	535	548	132
526	-0.201678	-8.1224	6.26																									613	538	550	135
527	-0.115419	-8.41904	6.52																									614	540	551	136
528	-0.323144	-8.32118	6.82																									615	554	552	137
529	-0.204192	-8.36921	7.1																									616	558	555	138
530	-0.627285	-8.30449	7.33																									637	563	557	139
531	-0.767167	-7.93512	7.83																									663	566	559	143
532	-0.455675	-8.70724	7.94																									677	568	562	144
533	-0.851577	-8.93299	8.07																									699	569	564	502
534	-0.752918	-8.65548	8.5																										570	565	506
535	-0.119443	-8.8562	8.75																										571	567	531
536	-0.681235	-8.36125	9.02																										572	577	543
537	-0.615046	-8.46617	9.3																										574	580	549
538	-0.0457584	-8.68578	9.57																										576	583	556
539	-0.62112	-8.61834	9.82																										585	586	602
540	-0.288691	-8.52124	10.04																										589	588	604
541	-0.43796	-8.86608	10.31																										591	590	617
542	-1.2842	-7.59775	10.51																										593	609	621
543	-0.422865	-4.54	10.76																										594	610	629
544	-0.475925	-8.93679	11.02																														595	611	630
545	-0.566841	-8.55867	11.27																														599	618	635
546	-0.586323	-8.94008	11.58																														600	619	636
547	-0.818358	-8.36531	11.84																														602	620	637
548	-0.454945	-8.63495	12.1																														604	622	649
549	-0.710996	-8.79887	12.38																														605	623	652
550	-0.824103	-8.46921	12.64																														607	624	667
551	-0.735684	-8.83947	12.9																														608	627	669
552	-0.726193	-8.49886	13.2																														612	628	672
553	-0.637716	-8.99775	13.44																														621	631	673
554	0.253506	-7.04573	13.75																														625	633	675
555	-0.413483	-8.80424	14.01																														640	634	678
556	-0.511887	-4.71	14.27																														646	639	680
557	-0.475176	-8.78321	14.52																														649	641	681
558	-0.364638	-8.32195	14.77																														650	645	683
559	-0.864815	-8.71174	15.01																														652	647	684
560	-0.232625	-7.22139	15.26																														653	648	685
561	-0.747106	-9.07597	15.53																														657	651	686
562	-0.734186	-8.83111	15.79																														665	654	689
563	-0.272344	-8.41137	16.08																														668	655	690
564	-0.0852872	-7.05306	16.34																														670	656	691
565	-0.53512	-8.77054	16.51																														671	658	692
566	-0.307049	-8.34443	16.75																														673	659	693
567	-0.712706	-9.06933	17.15																														674	660	699
568	0.248979	-4.50556	17.71																														676	661
569	-0.325659	-8.60351	17.98																														679	662
570	-0.288691	-3.79783	18.51																														682	666
571	-1.55767	-7.80252	20.46																														684	697
572	-1.13568	-7.30123	20.76																														685
573	-1.47933	-8.24224	21.06																														686
574	-1.19629	-7.82641	21.38																														687
575	-1.70438	-8.50273	21.68																														688
576	-1.34039	-7.40445	22.07																														690
577	-1.60912	-7.18484	22.4																														694
579	-1.36391	-4.331	22.95																														695
580	-1.43678	-3.54309	23.2																														696
581	-1.39333	-4.80488	23.43																														700
583	-1.49498	-4.84697	24.02																														701
584	-1.39836	-5.06028	24.27
585	-1.09796	-5.31753	24.53
586	-1.59139	-5.80569	24.82
587	-1.64403	-6.3928	25.57
588	-1.97978	-6.32065	25.92
589	-1.56144	-6.26676	26.32
590	-1.77247	-5.1298	26.65
591	-1.41533	-4.8119	27
592	-1.63423	-4.66177	27.3
593	-1.41131	-4.69768	27.6
594	-1.39597	-4.88549	27.93
595	-1.36378	-4.72324	31.24
596	-1.71193	-4.84104	31.59
597	-1.7328	-4.80615	31.85
599	-1.55843	-6.14075	32.78
600	-1.56874	-5.2046	33.16
601	-1.79767	-5.42467	33.54
602	-1.77299	-5.29582	33.93
603	-1.63297	-5.59655	34.31
604	-1.68547	-0.3	34.79
605	-1.32631	-5.01937	35.24
606	-1.71958	-4.85	35.61
607	-1.43495	-6.96726	36.08
608	-1.39194	-5.69082	36.56
609	-1.76748	-8.63774	36.98
610	-2.11241	-8.43753	37.37
611	-2.3909	-8.00392	37.89
612	-2.038	-8.25599	38.39
613	-2.27543	-8.36548	38.93
614	-2.46578	-12.4071	39.86
615	-2.62873	-10.8569	40.34
616	-2.42329	-8.8829	40.82
617	-2.47915	-8.2685	41.17
618	-1.53045	-6.77961	41.64
619	-1.49048	-7.09766	42.17
620	-1.74375	-7.30902	42.62
621	-1.69375	-2.29	43.26
622	-1.92333	-6.76618	43.78
623	-1.67856	-6.63212	44.26
624	-1.84566	-5.02285	44.64
625	-2.2407	-7	46.61
627	-2.19883	-7.03912	48.28
628	-1.93732	-5.18099	48.87
629	-1.79305	-0.32	49.3
630	-1.26895	0.5	49.82
631	-1.19925	-5.17161	50.62
633	-1.28268	-7.10831	51.87
634	-1.21174	-7.5072	52.47
635	-1.22557	-3.47	53.37
636	-1.29202	-7.14455	53.9
637	-1.54229	-7.50888	54.21
639	-2.63617	-12.4478	56.1
640	-1.55767	-8.46579	56.4
641	-2.10517	-8.27306	57.04
645	-1.98677	-9.98218	58.83
646	-1.86725	-8.70979	59.47
647	-1.51571	-7.46868	59.75
648	-1.80369	-7.45043	60.25
649	-2.05009	-6.9351	60.8
650	-1.57905	-7.01865	62.12
651	-1.69055	-7.10172	62.79
652	-1.70754	-6.50586	63.25
653	-1.49556	-9.00464	63.85
654	-1.92733	-8.94768	64.44
655	-1.5332	-8.0465	65.07
656	-1.33238	-8.29359	65.45
657	-1.2139	-8.74863	66.06
658	-1.08936	-7.00643	66.54
659	-0.344547	-7.45094	66.99
660	-1.14506	-8.90156	67.9
661	-0.867562	-8.27864	68.47
662	-1.29517	-9.10253	68.79
663	-1.35989	-9.11844	69.29
665	-1.57125	-9.10096	70.34
666	-0.878053	-7.36832	70.66
667	-0.916123	-4.38	71.16
668	-0.847233	-6.93357	71.62
669	-1.12601	-2.92	72.1
670	-0.744629	-7.53322	72.6
671	-0.783105	-7.52939	72.8
672	-1.47383	-4.2	74.33
673	-1.50944	-5.73	74.78
674	-0.819319	-9.55115	75.25
675	-1.06031	-5.34	75.69
676	-0.983537	-9.43311	75.95
677	-0.438314	-7.6996	76.47
678	-0.619215	-3.72	76.97
679	-0.13755	-7.83446	77.41
680	-0.822085	-4.88	77.98
681	-0.278173	-3.12	78.5
682	-0.0968094	-7.42259	79.03
683	-0.109407	-2.64	79.55
684	-0.450951	-3.58	80.15
685	-0.80403	-7.28896	80.7
686	-0.886281	-2.78	80.99
687	-0.172757	-7.58228	81.52
688	-0.550735	-7.10143	82.01
689	-0.958001	-2.85	82.49
690	-1.10796	-6.75369	83.06
691	-0.844905	-1.45	83.8
692	-0.623729	-3.58	86.23
693	-0.312277	-3.41	86.71
694	-0.327167	-7.86103	87.18
695	-0.774303	-8.45634	87.63
696	-1.39873	-10.6746	88.12
697	-0.733686	-7.12757	88.65
699	-0.938441	-3.3	89.53
700	-0.392804	-7.22126	89.99
701	-0.586697	-7.54446	90.47
